# 1 Early Evidence of Effectiveness of Digital Contact

## 2 Tracing for SARS-CoV-2 in Switzerland

3  
4 Marcel Salathé, Christian L. Althaus, Nanina Anderegg, Daniele Antonioli, Tala Ballouz,  
5 Edouard Bugnion, Srdjan Čapkun, Dennis Jackson, Sang-Il Kim, James R. Larus, Nicola  
6 Low, Wouter Lueks, Dominik Menges, Cédric Moullet, Mathias Payer, Julien Riou, Theresa  
7 Stadler, Carmela Troncoso, Effy Vayena, Viktor von Wyl

8  
9  
10 All authors contributed equally.

11 Correspondence: marcel.salathe@epfl.ch, viktor.vonwyl@uzh.ch

### 12 13 14 **Affiliations:**

15 MS: *Digital Epidemiology Lab, Global Health Institute, School of Life Sciences, EPFL, Geneva,*  
16 *Switzerland*

17 CA: *Institute of Social and Preventive Medicine, University of Bern, Bern, Switzerland; Interfaculty*  
18 *Platform for Data and Computational Science (INPUT), University of Bern, Bern, Switzerland.*

19 NA, JR: *Institute of Social and Preventive Medicine, University of Bern, Bern, Switzerland; Division of*  
20 *infectious diseases, Federal Office of Public Health, Liebefeld, Switzerland*

21 DA, EB, JRL, WL, MP, TS, CT, MS: *School of Computer and Communication Sciences, EPFL, Switzerland*

22 S-IK: *Federal Office of Public Health, Liebefeld, Switzerland*

23 SC, DJ: *Department of Computer Science, ETH Zurich, Switzerland*

24 NL: *Institute of Social and Preventive Medicine, University of Bern, Bern, Switzerland*  
25 VW: *Digital and Mobile Health Group, Epidemiology, Biostatistics & Prevention Institute, University of*  
26 *Zurich, Zurich, Switzerland*  
27 TB, DM: *Epidemiology, Biostatistics & Prevention Institute, University of Zurich, Zurich, Switzerland*  
28 EV: *Department of Health Sciences and Technology, Health Ethics and Policy Laboratory, ETH Zurich,*  
29 *Switzerland*  
30 CM: *Federal Office of Information Technology, Systems and Telecommunication, Bern, Switzerland*

31

32

33 **In the wake of the pandemic of coronavirus disease 2019 (COVID-19), contact tracing has**  
34 **become a key element of strategies to control the spread of severe acute respiratory**  
35 **syndrome coronavirus 2019 (SARS-CoV-2). Given the rapid and intense spread of SARS-**  
36 **CoV-2, digital contact tracing has emerged as a potential complementary tool to support**  
37 **containment and mitigation efforts. Early modelling studies highlighted the potential of**  
38 **digital contact tracing to break transmission chains, and Google and Apple subsequently**  
39 **developed the Exposure Notification (EN) framework, making it available to the vast**  
40 **majority of smartphones. A growing number of governments have launched or**  
41 **announced EN-based contact tracing apps, but their effectiveness remains unknown.**  
42 **Here, we report early findings of the digital contact tracing app deployment in**  
43 **Switzerland. We demonstrate proof-of-principle that digital contact tracing reaches**  
44 **exposed contacts, who then test positive for SARS-CoV-2. This indicates that digital**  
45 **contact tracing is an effective complementary tool for controlling the spread of SARS-**  
46 **CoV-2. Continued technical improvement and international compatibility can further**  
47 **increase the efficacy, particularly also across country borders.**

48 Contact tracing is a key element of the response to the pandemic of coronavirus disease  
49 2019 (COVID-19), caused by severe acute respiratory syndrome coronavirus 2019 (SARS-  
50 CoV-2). By August 30, 2020, nearly 25 million diagnosed cases and over 800,000 confirmed  
51 deaths had been recorded [1]. Contact tracing is part of a strategy of “test, trace, isolate  
52 and quarantine” (TTIQ), which aims to stop recently infected individuals from transmitting  
53 SARS-CoV-2 [2]. The capacity for transmission before the onset of symptoms and the short  
54 incubation period mean that contact tracing has to be fast to be effective [3,4]. While  
55 modelling results showed that rapid, digital contact tracing could be a critical tool for  
56 containment and mitigation efforts [5], early efforts to develop and deploy digital  
57 applications were hampered by critical limitations imposed by smartphone operating  
58 systems and concerns about confidentiality and data protection. The Exposure Notification  
59 (EN) framework, jointly developed by Google and Apple, addressed these limitations and  
60 enabled the implementation of digital contact tracing applications (apps) in which all  
61 proximity contact information, and any decision-making about whether or not to notify a  
62 user of an exposure, remain on a user’s device, rather than on the server of a central  
63 authority. This approach minimizes privacy risks [6], but the restriction of information to  
64 users’ devices means that data needed to evaluate the effectiveness of EN-based contact  
65 tracing apps have to be collected from different sources [7].

66

67 SwissCovid was the first EN-based contact tracing app launched by a governmental public  
68 health authority, initially as a pilot to a limited number of users, on May 25, 2020. On June  
69 25, 2020 the application was made available to the general population. A growing number  
70 of governments have launched or announced EN-based contact tracing apps, but their

71 effectiveness remains unknown. The significance of evaluating the effectiveness of EN-  
72 based contact tracing systems was highlighted by the World Health Organization [8] and is  
73 considered an ethical requirement for the continued deployment of such systems [9]. Here,  
74 we report early findings of the SwissCovid deployment from July 23, 2020 to September 10,  
75 2020 (hereafter referred to as the study period).

76

### 77 **How does SwissCovid work?**

78 The technical details of the SwissCovid system are given in [10], but briefly, SwissCovid uses  
79 the EN framework (version 1.2) to estimate proximity between phones. Each phone  
80 generates a daily Temporary Exposure Key (TEK), from which fast rotating proximity  
81 identifiers (RPI) are derived and exchanged with neighboring phones via Bluetooth Low  
82 Energy (BLE) beacons. Upon confirmation of SARS-CoV-2 infection by reverse  
83 transcriptase polymerase chain reaction (RT-PCR) testing, authorized Swiss health  
84 professionals can generate a single-use validation code (Covidcode), which is provided to  
85 the user. The Covidcode is associated with the beginning of the contagious period, which  
86 was determined to start 2 days before onset of symptoms [11] for symptomatic patients,  
87 and on the day of the test for patients who are asymptomatic at the time of testing. Upon  
88 entering a valid Covidcode in the app, TEKs for the contagious period are transmitted from  
89 the user's phone to the computer server of the Swiss Federal Office of Public Health (FOPH).  
90 All SwissCovid apps regularly contact the server for uploaded TEKs and associated data,  
91 and compute the exposure risk for the previous 10 days. To ensure privacy, notifications  
92 are shown only on the phone and are not forwarded to a server. During the study period,  
93 the notification provided users with the last day of exposure, a reminder that they are

94 entitled to a free RT-PCR test, and directed them to a SwissCovid-specific hotline (number  
95 only shown upon notification).

96

97 The BLE beacons, used by SwissCovid to estimate whether two devices have been in close  
98 proximity to each other for a period of time, are radio signals, which attenuate with  
99 distance. The EN framework application programming interface (API) estimates the amount  
100 of time a device has been close enough to other devices of infected individuals, based on  
101 three different attenuation intervals. To identify attenuation levels that would best  
102 estimate proximity below 1.5 meters, attenuation levels for different controlled and real-  
103 life scenarios produced by different devices at different distances and orientation were  
104 measured, and subsequently corrected using the per-device calibration values provided by  
105 the EN framework. Per-device calibration values take into account varying antenna and  
106 chip characteristics that influence sending and receiving powers. These results informed  
107 the parameterization of the EN framework so that SwissCovid users are notified if they  
108 spent at least 15 minutes in close proximity (1.5 meters) to RT-PCR-confirmed cases.

109

### 110 **Evaluation of privacy-preserving EN-based digital contact tracing**

111 Digital contract tracing is a new method, and it is therefore crucial to rapidly evaluate and  
112 continuously monitor its effectiveness in the field. Digital contact tracing apps aim to  
113 prevent secondary transmissions by warning exposed contacts as early as possible [7]. To  
114 be an effective intervention, several technical, behavioral and procedural conditions must  
115 be met [12] (Figure 1). The app must be used by both the infected index case and exposed  
116 contacts (Figure 1, row 1), the index case must enter the Covidcode following a positive RT-

117 PCR test (row 2), the exposed contacts must receive notifications (row 3), and the exposed  
118 contacts must respond to the warning in a timely fashion to prevent further transmission  
119 (rows 4 and 5). These conditions cannot be assessed directly via the app, due to the  
120 voluntary and decentralized nature of the system. Alternative indicators and data sources  
121 have therefore been developed or commissioned. In Switzerland, the Federal Statistical  
122 Office (FSO) monitors downloads and active use of SwissCovid and publicly releases the  
123 relevant number on a daily basis [13,14]. The FOPH updated the clinical registration form  
124 for RT-PCR-confirmed cases before the beginning of the study period, and included the  
125 SwissCovid app as an option for the reason for the test. In addition, several ongoing  
126 research studies collect information about app usage and notifications received on a  
127 monthly basis, e.g. Corona Immunitas [15], a nationwide Sars-CoV-2 seroprevalence study  
128 with digital follow-up surveys [16], and the COVID-19 Social Monitor  
129 (<https://csm.netlify.app>), a regular, longitudinal online-survey on social, economic, and  
130 behavioral aspects related to COVID-19, drawn from a representative panel for Switzerland.  
131 Furthermore, an ongoing cohort study embedded in contact tracing in the canton of Zurich  
132 [17], which enrolls RT-PCR-confirmed cases and their close contacts, investigates  
133 circumstances of transmissions and risk exposures to SARS-CoV-2, and collects data about  
134 use of the app.

135

### 136 **Downloads and active use of the SwissCovid app**

137 To measure the number of app downloads and active apps, reliable monitoring is already  
138 in place (Figure 1, Box 1). By September 10, 2020, the SwissCovid app has been downloaded  
139 2.36 million times, and the number of active apps per day has been estimated at 1.62 million

140 (Figure 2A). The number of active users corresponds to 18.9% of the Swiss population (8.6  
141 million).

142

143 During the study period, the FOPH reported 12,456 confirmed SARS-CoV-2 cases. During  
144 the same time period, the FOPH issued 2,447 (19.6% of confirmed cases) Covidcodes and  
145 1,645 (13.2% of confirmed cases, 67.2% of issued Covidcodes) of these Covidcodes were  
146 entered in the app by the users (Figure 1, Box 2; Figure 2B). While the decentralized nature  
147 makes it impossible to know how many notifications were subsequently generated, the  
148 entered Covidcodes triggered 1,695 phone calls to the SwissCovid hotline, thus providing  
149 evidence for actions undertaken by notified contacts (Figure 1, Box 3; Figure 2B).

150

151 The Zurich SARS-CoV-2 Cohort is a longitudinal study embedded in contact tracing in of  
152 the canton of Zurich with continuous enrollment of RT-PCR-positive index cases and  
153 exposed contacts. Recruitment started on Aug. 7, and until Sept. 11, there were 235 index  
154 cases (median age 34 years, 51% males), and 185 (median age 33 years, 53% males) exposed  
155 contacts enrolled. Of the 235 index cases, 148 (63%) used the app. Of those 148 app users,  
156 134 (91%) received, and 127 (86%) uploaded the Covidcode. Four cases did not upload the  
157 Covidcode because they had already informed their contacts when they received the code.  
158 Three cases reported to have gotten tested because of a SwissCovid alert. Of the 185  
159 exposed contacts, 132 (71%) used the app. Of those 132 app users, 46 (35%) received the  
160 SwissCovid warning related to the exposure that brought them into contact with the  
161 cantonal authorities.

162

## 163 **Evidence for app users responding to notifications**

164 Routine public health surveillance data suggest that notified contacts seek SARS-CoV-2  
165 testing (Figure 1, Box 4). Information on reason for RT-PCR testing has been collected  
166 during the study period and was available for 7,842 (63%) of the 12,456 confirmed cases.  
167 Among these, 6,380 reported symptoms compatible with COVID-19, 487 reported outbreak  
168 investigation, and 41 reported the SwissCovid app as the reason for the test (Figure 1, Box  
169 5). As the information on the reason for the test was only complete for 63% of confirmed  
170 cases, the total number of cases that were tested because of the notification by the app is  
171 likely higher. To estimate this number, we applied multiple imputation by chained equation  
172 [18], accounting for the effect of age and sex on the probability of missing information. This  
173 approach yielded a total of 65 cases (95% CI: 54-77) reporting the SwissCovid app as the  
174 reason for testing over the period considered. These cases displayed a slightly younger age  
175 distribution but a similar sex distribution compared to cases reporting another reason for  
176 testing (Figure 2C).

177

## 178 **Effectiveness of the SwissCovid app**

179 A key measure to quantify the effectiveness of contact tracing at identifying SARS-CoV-2  
180 infections is the number of positive contacts per index case. This number depends on  
181 several factors, such as the number of contacts traced per index case and the overall  
182 dynamics of the epidemic. Two large studies of classic contact tracing for SARS-CoV-2  
183 found 23 secondary cases in contacts of 100 index cases (0.23, 95% CI: 0.15-0.32) in Taiwan  
184 [19] and 2,169 positive cases in contacts of 5,706 index cases (0.38, 95% CI: 0.37-0.39) in  
185 South Korea [20]. To compare the effectiveness of the SwissCovid app to these classic



186 contact tracing studies, we estimated the number of notified positive contacts using the  
187 app per index case who entered a Covidcode using the formula  $\varepsilon=n/(c\mu)$ , where  $n=65$  (95%  
188 CI: 54-77) is the imputed total number of confirmed cases that reported the SwissCovid app  
189 as the reason for the test,  $c=1,645$  is the number of entered Covidcodes, and  $\mu=16.7\%$  is the  
190 proportion of the Swiss population that are active users of the app, weighted by the number  
191 of confirmed cases per day. Hence, the term  $c\mu$  corresponds to the number of index cases  
192 entering Covidcodes scaled by the probability that their contacts use the SwissCovid app  
193 assuming a homogeneous distribution of the app coverage. We obtained  $\varepsilon=0.24$  (95% CI:  
194 0.20-0.27), which is in a similar range to the numbers from the classic contact tracing  
195 studies.

196

197 Several factors could affect the estimated effectiveness of the SwissCovid app. Due to  
198 clustering of app users, the calculated  $\varepsilon$  could represent an upper estimate as the uptake  
199 of the SwissCovid app in contacts of app users might be higher than the average uptake in  
200 the Swiss population. Assuming  $\mu=71\%$ , which is the uptake of the app in contacts of RT-  
201 PCR-confirmed cases from the Zurich SARS-CoV-2 Cohort, we obtained  $\varepsilon=0.06$  (95% CI:  
202 0.05-0.06) as a lower estimate which would still represent a respectable effectiveness of  
203 the app at identifying SARS-CoV-2 infections in contacts of index cases. However, a  
204 number of factors can also contribute to an underestimate of  $\varepsilon$ . First, confirmed cases  
205 might only report the presence of symptoms as the reason for the test even though they  
206 were notified by the app. Second, due to the decentralized and voluntary nature of  
207 SwissCovid, there may have been more notified contacts that got infected and self-isolated  
208 following the notification, but did not get tested, and are thus missing from the analysis.

209 Third, reported numbers of RT-PCR-confirmed cases using the app for the study period  
210 might be slightly higher in reality due to time delays in reporting.

211

212 Reliable, continuous monitoring of app effectiveness indicators is still being improved. Also,  
213 citizen reports on social media (e.g. Twitter) have suggested multi-day delays in receiving  
214 Covidcodes following positive test results in some instances. Along the same lines, during  
215 the study period, only about two thirds of issued Covidcodes have been entered and  
216 triggered notifications (Figure 2B). Efforts to streamline procedures and app user  
217 interactions with local health authorities - i.e. a direct referral of notified hotline callers to  
218 the responsible local authorities - are underway. Our findings illustrate that digital contact  
219 tracing can be effective even with low uptake, as suggested by mathematical modeling [21].  
220 Because app coverage affects both the number of index cases and their contacts, the total  
221 number of SARS-CoV-2 infections that could be identified through digital contact tracing  
222 scales with the square of the coverage and could substantially increase with higher uptake  
223 (Figure 2D).

224

225 In conclusion, based on the data collected during the initial deployment of the SwissCovid  
226 app, we argue that voluntary digital contact tracing can show similar effectiveness at  
227 identifying infected partners of index cases as classic contact tracing, provided that both  
228 the index case and the exposed contacts use the app. As the effectiveness of digital contact  
229 tracing crucially depends on a strong embedding into an efficient testing and contact  
230 tracing infrastructure on the ground, apps like SwissCovid represent a helpful  
231 complementary tool for controlling the spread of SARS-CoV-2. The strength of evidence

232 for app effectiveness as summarized in Figure 1 illustrates that most indicators have  
233 reached at least a “proof-of-principle” stage. That is, the outcome of interest was observed  
234 independently in two data sources in all important key indicators. There is, however, still  
235 room for improvement. Upcoming improvements in the EN API by Apple and Google will  
236 increase the precision in determining risk, and reduce delay in communicating it to users.  
237 International interoperability exchanges, planned for October 2020, will increase the  
238 effectiveness of the app, in particular in the countries bordering Switzerland. Speed is  
239 essential to the effectiveness of TTIQ strategies [4,5]. Reducing the time to quarantine for  
240 contacts, as a result of digital contact tracing, should provide an additional, important  
241 benefit to COVID-19 mitigation efforts.

242

### 243 **Acknowledgement**

244 The authors would like to acknowledge the Swiss Federal Office of Public Health, the  
245 Federal Statistical Office, and the Federal Office of Information Technology, Systems and  
246 Telecommunication for their collaborative contributions which were essential for the  
247 development, deployment, and assessment of SwissCovid. We thank the epidemiology unit  
248 at the Federal Office of Public Health for the contributions in providing data and  
249 commenting on the results and conclusions. We would also like to thank the Cantonal  
250 Health Directorate Zurich for their support and collaboration in the conduct of the Zurich  
251 SARS-CoV-2 Cohort, as well as the Swiss School of Public Health and the Corona Immunitas  
252 program for contributing to the study with their structure and services.

253

254

255 **Funding**

256 MS received funding from the European Union’s Horizon 2020 research and innovation  
257 programme - project “Versatile emerging infectious disease observatory - forecasting,  
258 nowcasting and tracking in a changing world (VEO)” (No. 874735). CA received funding from  
259 the European Union’s Horizon 2020 research and innovation programme - project EpiPose  
260 (No 101003688) and the Swiss National Science Foundation (grant 196046). NL received  
261 funding from the European Union’s Horizon 2020 research and innovation programme -  
262 project EpiPose (No 101003688) and the Swiss National Science Foundation (grant 176233).  
263 TB, DM and VvW received funding from the Cantonal Health Directorate Zurich, the  
264 Federal Office of Public Health, the University of Zurich Foundation Pandemic Fund and  
265 the Fondation Les Mûrons for the Zurich SARS-CoV-2 Cohort. EPFL is receiving base  
266 funding for both research and development of SwissCovid from the Fondation Botnar.

267

**FIGURES**

268

|                                                                           | <b>Early signal</b><br>(observed in single data source) | <b>Proof of principle</b><br>(observed in two independent data sources) | <b>Reliable, valid quantification</b><br>(regular monitoring in place) | <b>Target reached</b><br>(targets clearly defined and met by indicators) |
|---------------------------------------------------------------------------|---------------------------------------------------------|-------------------------------------------------------------------------|------------------------------------------------------------------------|--------------------------------------------------------------------------|
| 1) Apps are downloaded and active                                         |                                                         |                                                                         | <b>Box 1:</b> Regular monitoring through Federal Statistical Office    |                                                                          |
| 2) Covidcodes are issued upon PCR-positive test and entered               |                                                         |                                                                         | <b>Box 2:</b> Regular monitoring through Federal Statistical Office    |                                                                          |
| 3) Notifications are received by exposed persons                          |                                                         | <b>Box 3:</b> Reports from two independent population surveys           |                                                                        |                                                                          |
| 4) Notifications lead to actions in exposed persons (testing, quarantine) |                                                         | <b>Box 4:</b> Mandatory reporting upon PCR+ test                        |                                                                        |                                                                          |
| 5) Actions lead to prevention of secondary transmission                   |                                                         | <b>Box 5:</b> Mandatory reporting upon PCR+ test; contact tracing study |                                                                        |                                                                          |


  
 Accumulation of evidence

269

270

271 **Figure 1: Quality of evidence for SwissCovid app effectiveness.** Row labels: Necessary

272 technical, procedural and behavioral conditions for digital contact tracing to be effective.

273 Columns: Milestones in evidence accumulation. Green boxes indicate available data

274 sources for evidence assessments; quantitative information related to green boxes are

275 provided in the main text.

276

277

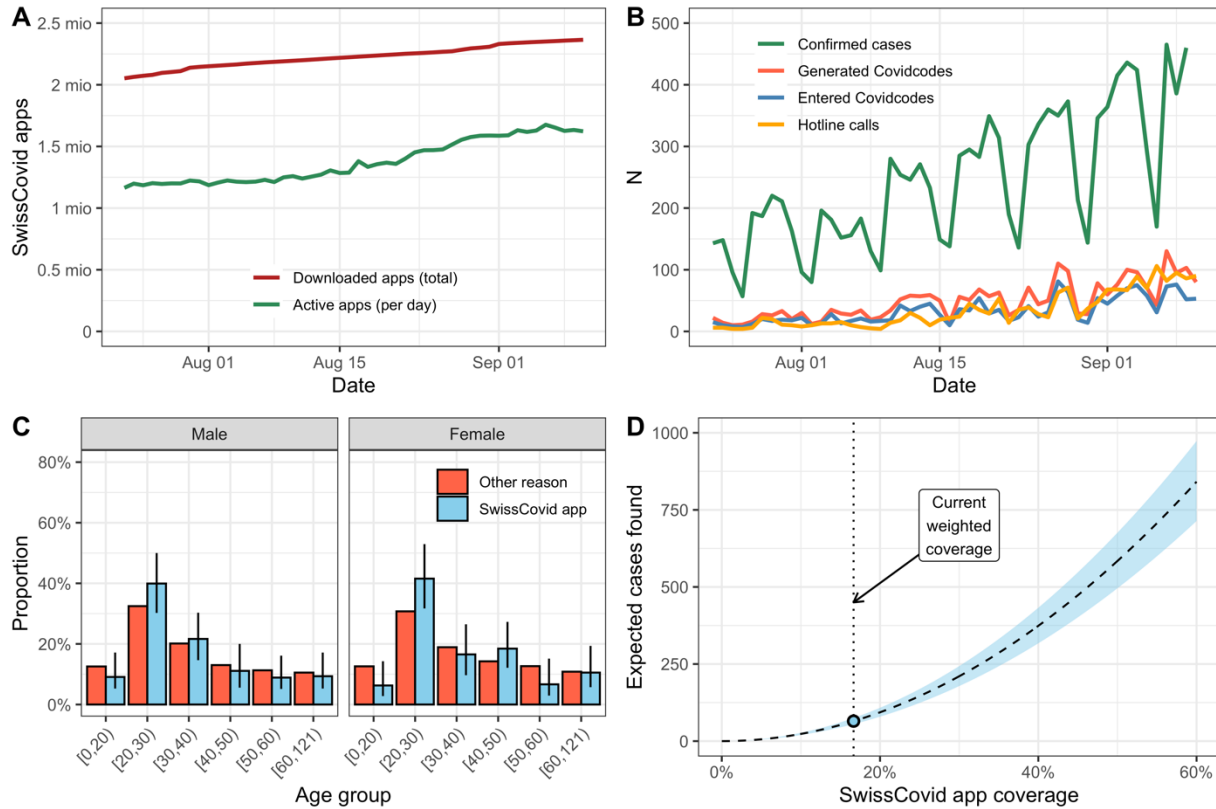

278

279

280

281 **Figure 2: SwissCovid app measures.** (A) Total number of downloaded apps and daily

282 number of active apps. (B) Daily numbers of confirmed SARS-CoV-2 cases, generated

283 Covidcodes, entered Covidcodes and hotline calls. (C) Age distribution of cases stratified

284 by the reason for RT-PCR test (either SwissCovid app or other reason). (D) Expected

285 number of RT-PCR-confirmed cases that were tested because of a notification by the app

286 as a function of hypothetical app coverage during the study period. Error bars and the blue

287 shaded area correspond to 95% confidence intervals.

288

289 **REFERENCES**

290

291 1. World Health Organization. Coronavirus disease (COVID-19) - Weekly Epidemiological Update.

292 [cited 4 Sep 2020]. Available: [https://www.who.int/docs/default-](https://www.who.int/docs/default-source/coronaviruse/situation-reports/20200831-weekly-epi-update-3.pdf?sfvrsn=d7032a2a_4)

293 [source/coronaviruse/situation-reports/20200831-weekly-epi-update-3.pdf?sfvrsn=d7032a2a\\_4](https://www.who.int/docs/default-source/coronaviruse/situation-reports/20200831-weekly-epi-update-3.pdf?sfvrsn=d7032a2a_4)

294

295 2. Salathé M, Althaus CL, Neher R, Stringhini S, Hodcroft E, Fellay J, et al. COVID-19 epidemic in

296 Switzerland: on the importance of testing, contact tracing and isolation. Swiss Medical Weekly.

297 2020. doi:<https://doi.org/10.4414/smw.2020.20225>

298

299 3. Aleta A, Martin-Corral D, Piontti AP y, Ajelli M, Litvinova M, Chinazzi M, et al. Modeling the

300 impact of social distancing, testing, contact tracing and household quarantine on second-wave

301 scenarios of the COVID-19 epidemic. Medrxiv. 2020; 2020.05.06.20092841.

302 doi:[10.1101/2020.05.06.20092841](https://doi.org/10.1101/2020.05.06.20092841)

303

304 4. Kucharski AJ, Klepac P, Conlan AJK, Kissler SM, Tang ML, Fry H, et al. Effectiveness of isolation,

305 testing, contact tracing, and physical distancing on reducing transmission of SARS-CoV-2 in

306 different settings: a mathematical modelling study. Lancet Infect Dis. 2020. doi:[10.1016/s1473-](https://doi.org/10.1016/s1473-3099(20)30457-6)

307 [3099\(20\)30457-6](https://doi.org/10.1016/s1473-3099(20)30457-6)

308

309 5. Ferretti L, Wymant C, Kendall M, Zhao L, Nurtay A, Abeler-Dörner L, et al. Quantifying SARS-

310 CoV-2 transmission suggests epidemic control with digital contact tracing. Science. 2020;368:

311 [eabb6936](https://doi.org/10.1126/science.abb6936). doi:[10.1126/science.abb6936](https://doi.org/10.1126/science.abb6936)

312

312 6. Troncoso C, Payer M, Hubaux J-P, Salathé M, Larus J, Bugnion E, et al. Decentralized Privacy-

313 Preserving Proximity Tracing. arxiv. 2020. Available: <https://arxiv.org/abs/2005.12273>

314

- 315 7. Wyl V von, Bonhoeffer S, Bugnion E, Salathé M, Stadler T, Troncoso C, et al. A research agenda  
316 for digital proximity tracing apps. Swiss Medical Weekly. 2020.  
317 doi:<https://doi.org/10.4414/smw.2020.20324>  
318
- 319 8. World Health Organization. Ethical considerations to guide the use of digital proximity tracking  
320 technologies for COVID-19 contact tracing. [cited 4 Sep 2020]. Available:  
321 [https://www.who.int/publications/i/item/WHO-2019-nCoV-Ethics\\_Contact\\_tracing\\_apps-](https://www.who.int/publications/i/item/WHO-2019-nCoV-Ethics_Contact_tracing_apps-2020.1)  
322 [2020.1](https://www.who.int/publications/i/item/WHO-2019-nCoV-Ethics_Contact_tracing_apps-2020.1)  
323
- 324 9. Gasser U, Ienca M, Scheibner J, Sleigh J, Vayena E. Digital tools against COVID-19: taxonomy,  
325 ethical challenges, and navigation aid. Lancet Digital Heal. 2020;2: e425–e434. doi:10.1016/s2589-  
326 7500(20)30137-0  
327
- 328 10. Telecommunication SFO of ITS and. SwissCovid Exposure Score Calculation. [cited 4 Sep 2020].  
329 Available: [https://github.com/admin-ch/PT-System-Documents/blob/master/SwissCovid-](https://github.com/admin-ch/PT-System-Documents/blob/master/SwissCovid-ExposureScore.pdf)  
330 [ExposureScore.pdf](https://github.com/admin-ch/PT-System-Documents/blob/master/SwissCovid-ExposureScore.pdf)  
331
- 332 11. World Health Organization. Contact tracing in the context of COVID-19. [cited 4 Sep 2020].  
333 Available: [https://www.who.int/publications/i/item/contact-tracing-in-the-context-of-covid-](https://www.who.int/publications/i/item/contact-tracing-in-the-context-of-covid-19)  
334 [19](https://www.who.int/publications/i/item/contact-tracing-in-the-context-of-covid-19)  
335
- 336 12. Wyl V von, Hoeglinger M, Sieber C, Kaufmann M, Moser A, Serra-Burriel M, et al. Are COVID-19  
337 proximity tracing apps working under real-world conditions? Indicator development and  
338 assessment of drivers for app (non-)use. medRxiv. 2020. doi:10.1101/2020.08.29.20184382  
339



- 340 13. Swiss Federal Office of Statistics. Calculation methods for estimating the number of active  
341 SwissCovid apps. [cited 4 Sep 2020]. Available:  
342 <https://www.experimental.bfs.admin.ch/bfsstatic/dam/assets/13667538/master>  
343
- 344 14. Swiss Federal Office of Statistics. SwissCovid App Monitoring. [cited 4 Sep 2020]. Available:  
345 [https://www.experimental.bfs.admin.ch/expstat/en/home/innovative-methods/swisscovid-](https://www.experimental.bfs.admin.ch/expstat/en/home/innovative-methods/swisscovid-app-monitoring.html)  
346 [app-monitoring.html](https://www.experimental.bfs.admin.ch/expstat/en/home/innovative-methods/swisscovid-app-monitoring.html)  
347
- 348 15. Corona Immunitas. [cited 4 Sep 2020]. Available: <https://www.corona-immunitas.ch/program>  
349
- 350 16. Stringhini S, Wisniak A, Piumatti G, Azman AS, Lauer SA, Baysson H, et al. Seroprevalence of  
351 anti-SARS-CoV-2 IgG antibodies in Geneva, Switzerland (SEROCoV-POP): a population-based  
352 study. *Lancet*. 2020;396: 313–319. doi:10.1016/s0140-6736(20)31304-0  
353
- 354 17. Zurich Coronavirus Cohort: an observational study to determine long-term clinical outcomes  
355 and immune responses after coronavirus infection (COVID-19), assess the influence of virus  
356 genetics, and examine the spread of the coronavirus in the population of the Canton of Zurich,  
357 Switzerland. [cited 4 Sep 2020]. Available: <http://www.isrctn.com/ISRCTN14990068>  
358
- 359 18. White IR, Royston P, Wood AM. Multiple imputation using chained equations: Issues and  
360 guidance for practice. *Stat Med*. 2011;30: 377–399. doi:10.1002/sim.4067  
361
- 362 19. Cheng H-Y, Jian S-W, Liu D-P, Ng T-C, Huang W-T, Lin H-H, et al. Contact Tracing Assessment  
363 of COVID-19 Transmission Dynamics in Taiwan and Risk at Different Exposure Periods Before and  
364 After Symptom Onset. *Jama Intern Med*. 2020;180. doi:10.1001/jamainternmed.2020.2020

365

366 20. Park YJ, Choe YJ, Park O, Park SY, Kim Y-M, Kim J, et al. Contact Tracing during Coronavirus

367 Disease Outbreak, South Korea, 2020. Emerging Infectious Diseases. 2020. doi:DOI:

368 10.3201/eid2610.201315

369

370 21. Abueg M, Hinch R, Wu N, Liu L, Probert WJM, Wu A, et al. Modeling the combined effect of

371 digital exposure notification and non-pharmaceutical interventions on the COVID-19 epidemic in

372 Washington state. medRxiv. 2020. doi:10.1101/2020.08.29.20184135
